# Supplementary material for: Multiplexing determination of lung cancer biomarkers using electrochemical and surface-enhanced Raman spectroscopic techniques
Source: Royal Society of Chemistry journal article supplement (doi:10.1039/c5nj00445d), 2015-01-01
Supplement: c5nj00445d1.pdf [file c5nj00445d1.pdf]

## *Supporting Information*

### **Multiplexing determination of lung cancer biomarkers using electrochemical and surface-enhanced Raman spectroscopic techniques**

Wenbo Lu, Ying Wang, Xiaowei Cao, Li Li, Jian Dong, Weiping Qian\*

*State Key Laboratory of Bioelectronics, School of Biological Science and Medical Engineering, Southeast University, Nanjing 210096, China*

*\*Corresponding author: Tel: (+86)25-83795719; Fax: (+86)25-83795719. E-mail:*

*wqian@seu.edu.cn*

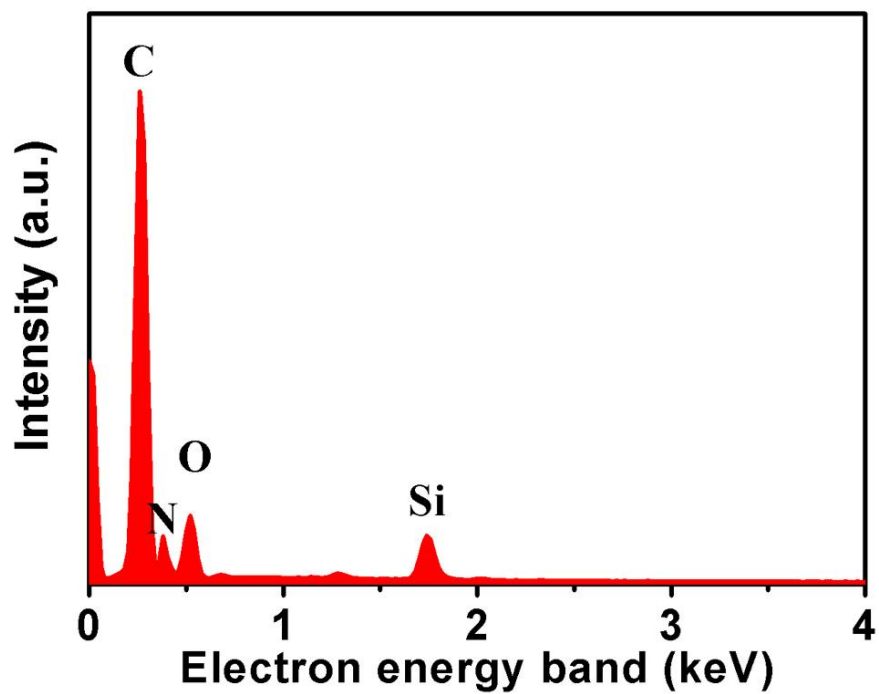

**Figure S1** The energy-dispersed spectrum of the AAR microspheres.

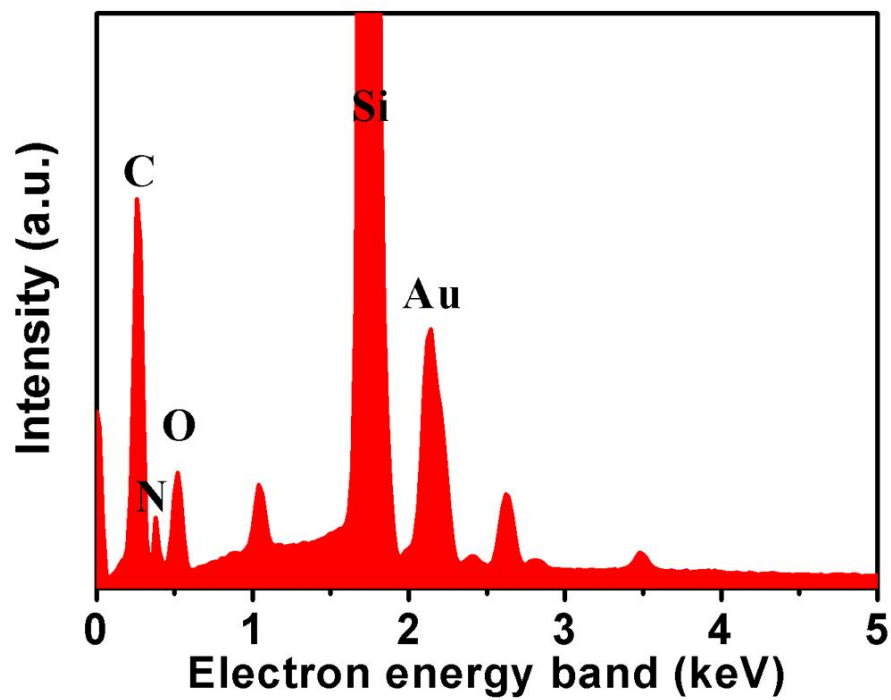

**Figure S2** The chemical structure of the AuNPs/AAR microspheres.

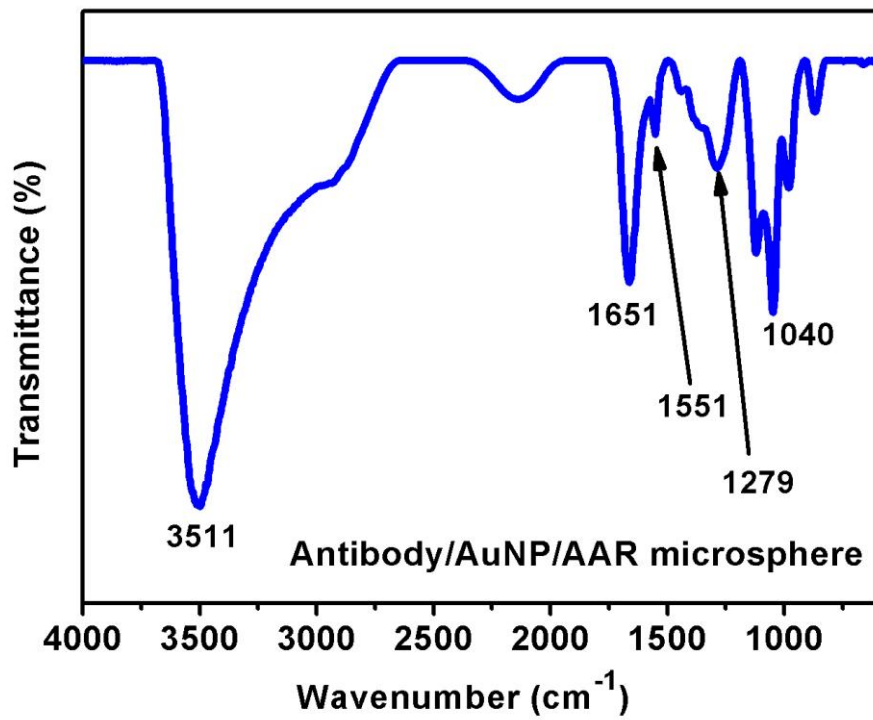

**Figure S3** FT-IR spectra of the anti-CEA and anti-CK-19 decorated AuNPs/AAR microspheres.

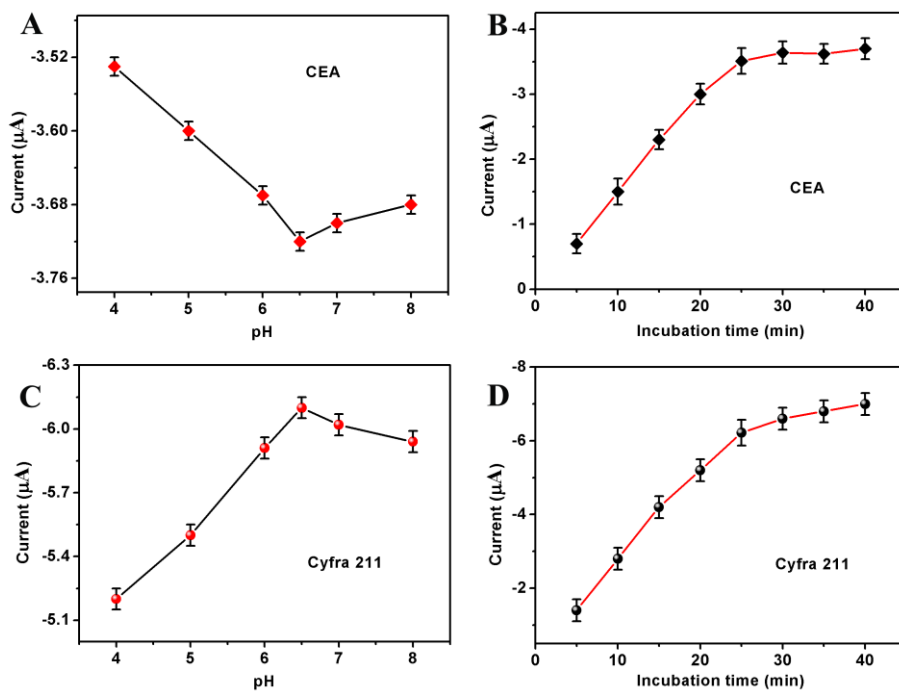

**Figure S4** Effects of (A) pH of detection solution and (B) incubation time on SWV responses to 10 ng/mL of CEA at the modified electrode. Effects of (C) pH of detection solution and (D) incubation time on SWV responses to 10 ng/mL of CK-19 at the modified electrode.

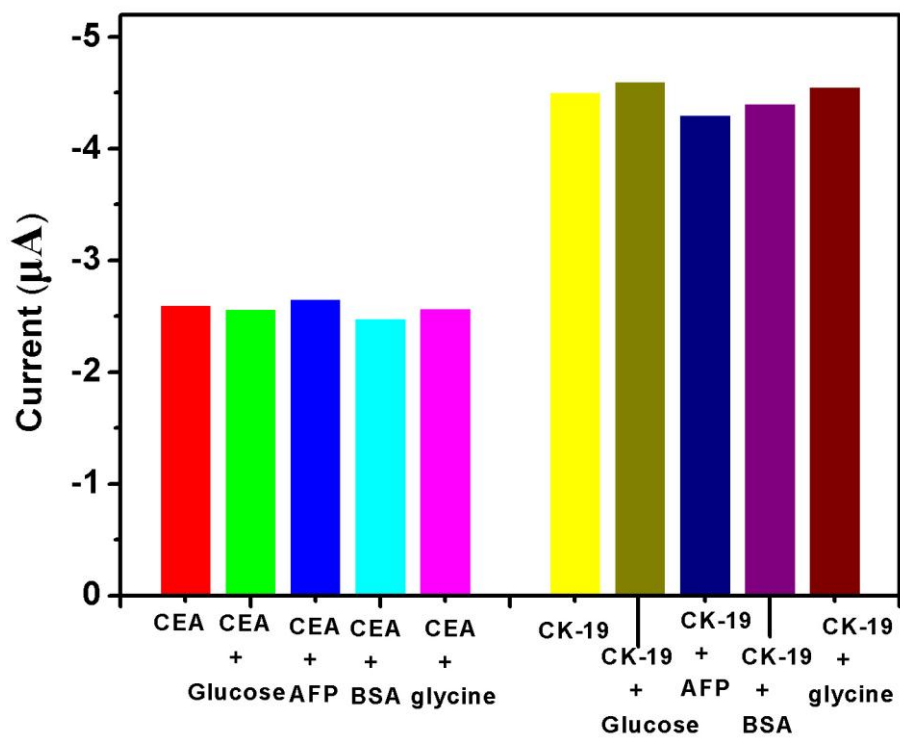

**Figure S5** Current response of the immunosensor to the 10 ng/mL of CEA and CK-19 solution containing 50 ng/mL of interfering substances.
